# Supplementary material for: Toughening modification of PLLA by combination of copolymerization and in situ reactive blending
Source: Royal Society of Chemistry journal article supplement (doi:10.1039/c6ra23267a), 2016-01-01
Supplement: c6ra23267a1.pdf [file c6ra23267a1.pdf]

There is no supplementary information for this manuscript.
